# Supplementary material for: Proteomic characterization of epithelial ovarian cancer delineates molecular signatures and therapeutic targets in distinct histological subtypes
Source: PubMed Central journal article supplement (PMC10684593; doi:10.1038/s41467-023-43282-3), 2023-11-28
Supplement: 41467_2023_43282_MOESM3_ESM.pdf [file 41467_2023_43282_MOESM3_ESM.pdf]

## **Description of Additional Supplementary Files**

**Supplementary Data 1.** Clinicopathological characteristics of EOC patients.

**Supplementary Data 2.** Summary of clinical information for CCC, EC, and SC patients.

**Supplementary Data 3.** Dysregulated proteins in EOC.

**Supplementary Data 4.** Biological processes or signaling pathways enriched for up- and down-regulated proteins, respectively.

**Supplementary Data 5.** GO biological processes and KEGG pathways with GSEA enrichment.

**Supplementary Data 6.** Prognostic value of key proteins in disordered signaling pathways.

**Supplementary Data 7.** Dysregulated proteins in CCC, EC and SC histological subtypes.

**Supplementary Data 8.** KEGG signaling pathways enriched for tumor progression landmarks of each histological subtype.

**Supplementary Data 9.** Raw data of CCK-8 assays.

**Supplementary Data 10.** Raw data of flow cytometric analysis of cell cycle.

**Supplementary Data 11.** Raw data of flow cytometric analysis of cell apoptosis.

**Supplementary Data 12.** Raw data of transwell assay (cell migration).

**Supplementary Data 13.** Raw data of matrigel-coated transwell assay (cell invasion).

**Supplementary Data 14.** Materials and reagents required for sample preparation.
